# Supplementary material for: Effects of Prebiotic and Probiotic Supplementation on Lactase Deficiency and Lactose Intolerance: A Systematic Review of Controlled Trials
Source: MDPI journal article supplement (doi:10.3390/nu12051487), 2020-05-20
Supplement: s1 [file s1]

|                             | Random sequence generation (selection bias) | Allocation concealment (selection bias) | Blinding of participants and personnel (performance bias) | Blinding of outcome assessment (detection bias) | Incomplete outcome data (attrition bias) | Selective reporting (reporting bias) | Other bias |
|-----------------------------|---------------------------------------------|-----------------------------------------|-----------------------------------------------------------|-------------------------------------------------|------------------------------------------|--------------------------------------|------------|
| Kim et al. (1983) [36]      | +                                           | ?                                       | +                                                         | ?                                               | +                                        | ?                                    | +          |
| Lin et al. (1991) [37]      | +                                           | ?                                       | +                                                         | +                                               | +                                        | ?                                    | +          |
| Lin et al. (1998) [35]      | +                                           | ?                                       | +                                                         | ?                                               | +                                        | ?                                    | +          |
| Montes et al. (1995) [29]   | +                                           | ?                                       | +                                                         | +                                               | +                                        | ?                                    | +          |
| Ojetti et al. (2010) [32]   | +                                           | ?                                       | +                                                         | ?                                               | +                                        | ?                                    | +          |
| Pakdaman et al. (2016) [30] | +                                           | +                                       | +                                                         | +                                               | +                                        | ?                                    | +          |
| Roškar et al. (2017) [31]   | +                                           | +                                       | +                                                         | ?                                               | ?                                        | ?                                    | +          |
| Savaiano et al. (2013) [33] | +                                           | +                                       | +                                                         | +                                               | +                                        | ?                                    | +          |
| Vitellio et al. (2019) [34] | +                                           | +                                       | +                                                         | ?                                               | ?                                        | ?                                    | +          |

**Supplemental Figure 1.** Risk of bias summary: review of authors' judgements on each risk of bias item for each included study

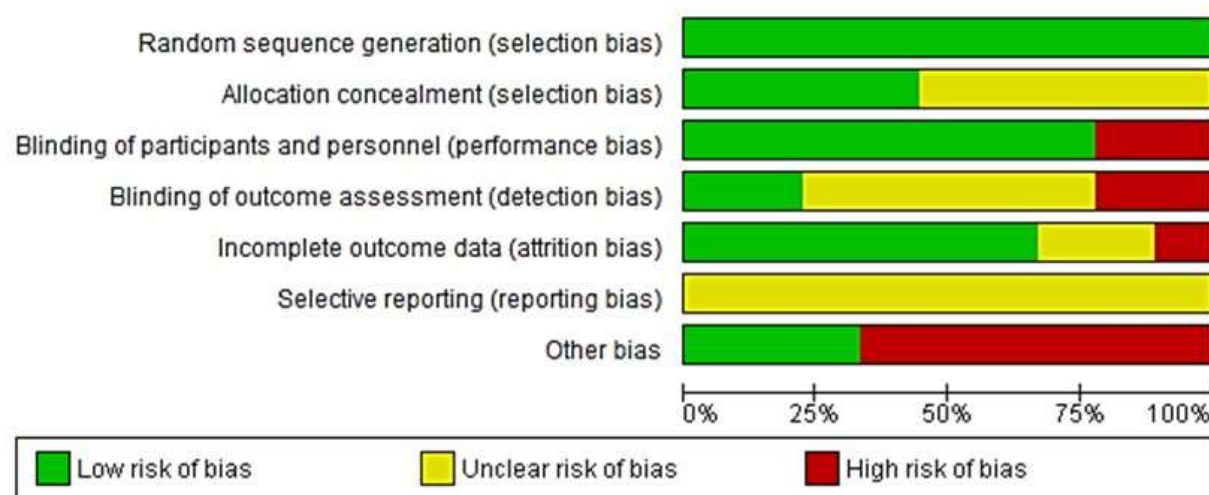

**Supplemental Figure 2.** Risk of bias graph: review of authors' judgements on each risk of bias item presented as percentages across the studies
